# Supplementary material
Source: PubMed Central journal article supplement (PMC7670397)
Supplement: jamainternmed-e205928-s001.pdf [file jamainternmed-e205928-s001.pdf]

## Supplemental Online Content

Patel SY, Mehrotra A, Huskamp HA, et al. Trends in outpatient care delivery and telemedicine during the COVID-19 pandemic in the US. *JAMA Intern Med*. Published online November 16, 2020. doi: 10.1001/jamainternmed.2020.5928

### **eAppendix.** Supplemental Methods

This supplemental material has been provided by the authors to give readers additional information about their work.

## eAppendix, Supplemental Methods

### Study Sample Definition

To define our study sample, we employed an enrollee-level inclusion criterion. At the enrollee level, we included individuals with 12 months of continuous medical enrollment in any plan from July 2019 through June 2020 (n=16,740,365).

### Classification of Outpatient Visits

We defined outpatient visits using Medicare's expanded list of outpatient Common Procedural Terminology (CPT) codes. We excluded all CPT codes that were specific for clinical settings outside of clinician offices (e.g., emergency departments, hospital inpatient, nursing home or dialysis facility codes). Below is the list of the CPT codes specific to outpatient care that were included in our analysis.

|       |       |       |       |       |       |       |       |
|-------|-------|-------|-------|-------|-------|-------|-------|
| 77427 | 90954 | 92012 | 96127 | 97112 | 97802 | 99473 | G0438 |
| 90785 | 90955 | 92012 | 96130 | 97155 | 97803 | 99483 | G0439 |
| 90791 | 90956 | 92014 | 96131 | 97156 | 97804 | 99495 | G0442 |
| 90792 | 90957 | 92507 | 96132 | 97157 | 99201 | 99496 | G0443 |
| 90832 | 90958 | 92508 | 96133 | 97158 | 99202 | 99497 | G0444 |
| 90833 | 90959 | 92521 | 96136 | 97161 | 99203 | 99498 | G0445 |
| 90834 | 90960 | 92522 | 96137 | 97162 | 99204 | 0373T | G0446 |
| 90836 | 90961 | 92523 | 96138 | 97163 | 99205 | S9152 | G0447 |
| 90837 | 90962 | 92524 | 96139 | 97164 | 99211 | 0362T | G0506 |
| 90838 | 90963 | 92601 | 96156 | 97165 | 99212 | G0108 | G0513 |
| 90839 | 90964 | 92602 | 96158 | 97166 | 99213 | G0109 | G0514 |
| 90840 | 90965 | 92603 | 96159 | 97167 | 99214 | G0270 | G2086 |
| 90845 | 90966 | 92604 | 96160 | 97168 | 99215 | G0296 | G2087 |
| 90846 | 90967 | 94005 | 96161 | 97530 | 99354 | G0396 | G2088 |
| 90847 | 90968 | 94664 | 96164 | 97535 | 99355 | G0397 | 97116 |
| 90853 | 90969 | 96110 | 96165 | 97542 | 99406 | G0410 | 97150 |
| 90875 | 90970 | 96112 | 96167 | 97750 | 99407 | G0420 | 97151 |
| 90951 | 92002 | 96113 | 96168 | 97755 | 99441 | G0421 | 97152 |
| 90952 | 92004 | 96116 | 96170 | 97760 | 99442 | G0436 | 97153 |
| 90953 | 97154 | 96121 | 96171 | 97761 | 99443 | G0437 |       |

Below is the list of CPT codes that are specific to clinical settings outside of clinician offices that were excluded from our analysis.

|       |       |       |       |       |       |       |       |
|-------|-------|-------|-------|-------|-------|-------|-------|
| G0459 | 99356 | 99468 | 99337 | 99316 | 99291 | 99234 | 99220 |
| G0427 | 99480 | 99350 | 99336 | 99315 | 99285 | 99233 | 99219 |
| G0426 | 99479 | 99349 | 99335 | 99310 | 99284 | 99232 | 99218 |
| G0425 | 99478 | 99348 | 99334 | 99309 | 99283 | 99231 | 99217 |
| G0509 | 99477 | 99347 | 99328 | 99308 | 99282 | 99226 | 94004 |
| G0508 | 99476 | 99345 | 99327 | 99307 | 99281 | 99225 | 94003 |
| G0408 | 99475 | 99344 | 99326 | 99306 | 99239 | 99224 | 94002 |
| G0407 | 99472 | 99343 | 99325 | 99305 | 99238 | 99223 |       |
| G0406 | 99471 | 99342 | 99324 | 99304 | 99236 | 99222 |       |
| 99357 | 99469 | 99341 | G9685 | 99292 | 99235 | 99221 |       |

### Completeness of Outpatient Claims

Some of the most recent data in the OptumLabs database may be underpopulated because of the typical lag, of up to several weeks, between service delivery and the processing and reporting of medical claims. We tested the completeness of claims during each week of our study period by calculating the weekly rates of childbirths per 1,000 female enrollees between the ages of 15 and 44, assuming that the rate of childbirths would remain stable despite the COVID-19 pandemic. The weekly rate of childbirths remained stable from January 1 until June 16, 2020.

| Week | Date        | Number of Births | %   | Number of Women ages 15-44 with 12 months enrollment | Number of childbirths per 1,000 women |
|------|-------------|------------------|-----|------------------------------------------------------|---------------------------------------|
| 1    | Jan1-Jan7   | 3,572            | 5.3 | 3,010,677                                            | 1.186                                 |
| 2    | Jan8-Jan14  | 2,650            | 3.9 | 3,010,677                                            | 0.880                                 |
| 3    | Jan15-Jan21 | 2,569            | 3.8 | 3,010,677                                            | 0.853                                 |
| 4    | Jan22-Jan28 | 2,511            | 3.7 | 3,010,677                                            | 0.834                                 |
| 5    | Jan29-Feb4  | 2,683            | 4.0 | 3,010,677                                            | 0.891                                 |
| 6    | Feb5-Feb11  | 2,594            | 3.9 | 3,010,677                                            | 0.862                                 |
| 7    | Feb12-Feb18 | 2,426            | 3.6 | 3,010,677                                            | 0.806                                 |
| 8    | Feb19-Feb25 | 2,589            | 3.8 | 3,010,677                                            | 0.860                                 |
| 9    | Feb26-Mar3  | 2,554            | 3.8 | 3,010,677                                            | 0.848                                 |
| 10   | Mar4-Mar10  | 2,593            | 3.9 | 3,010,677                                            | 0.861                                 |
| 11   | Mar11-Mar17 | 2,655            | 3.9 | 3,010,677                                            | 0.882                                 |
| 12   | Mar18-Mar24 | 2,678            | 4.0 | 3,010,677                                            | 0.890                                 |
| 13   | Mar25-Mar31 | 2,622            | 3.9 | 3,010,677                                            | 0.871                                 |
| 14   | Apr1-Apr7   | 2,623            | 3.9 | 3,010,677                                            | 0.871                                 |
| 15   | Apr8-Apr14  | 2,468            | 3.7 | 3,010,677                                            | 0.820                                 |
| 16   | Apr15-Apr21 | 2,573            | 3.8 | 3,010,677                                            | 0.855                                 |
| 17   | Apr22-Apr28 | 2,547            | 3.8 | 3,010,677                                            | 0.846                                 |
| 18   | Apr29-May5  | 2,639            | 3.9 | 3,010,677                                            | 0.877                                 |
| 19   | May6-May12  | 2,574            | 3.8 | 3,010,677                                            | 0.855                                 |
| 20   | May13-May19 | 2,679            | 4.0 | 3,010,677                                            | 0.890                                 |
| 21   | May20-May26 | 2,496            | 3.7 | 3,010,677                                            | 0.829                                 |
| 22   | May27-Jun2  | 2,633            | 3.9 | 3,010,677                                            | 0.875                                 |

|    |                     |              |            |                  |              |
|----|---------------------|--------------|------------|------------------|--------------|
| 23 | Jun3-Jun9           | 2,527        | 3.8        | 3,010,677        | 0.839        |
| 24 | Jun10-Jun16         | 2,588        | 3.8        | 3,010,677        | 0.860        |
| 25 | <i>Jun17-Jun23*</i> | <i>2,494</i> | <i>3.7</i> | <i>3,010,677</i> | <i>0.828</i> |
| 26 | <i>Jun24-Jun30*</i> | <i>1,900</i> | <i>2.8</i> | <i>3,010,677</i> | <i>0.631</i> |

\*June 16<sup>th</sup> marks end of study period. Italicized weeks are not in study period.
